# Supplementary material
Source: PubMed Central journal article supplement (PMC2845927)
Supplement: NIHMS182460-supplement-06.pdf [file NIHMS182460-supplement-06.pdf]

## SUPPLEMENTAL METHODS

**RNA expression analysis** - RNA was isolated from the pancreas using the RNeasy isolation system (QIAGEN, Valencia, CA) and reverse transcribed using the iScript™ cDNA synthesis kit (Bio-Rad, Hercules, CA). cDNA reactions were amplified with QPCR SYBR Green Mix (ABgene) and the following gene-specific primers:

*ErbB1* (5'-gactccgtctgtctcggatta-3', 5'-cagttgggtgagcctgttact-3')

*ErbB2* (5'-ctagacaaccgagaccctttg-3', 5'-acaaaaccatgtcctgtagc-3')

*ErbB3* (5'-gaggagtctgtgttgccagtt-3', 5'-attgctagagtccacggtctg-3')

*ErbB4* (5'-gcattattcgtgggacaaaac-3', 5'-tccgaacaatatcttgccagt-3')

*EGF* (5'-tagcatactcagcgtcacagc-3', 5'-cgagagatgctctttccttgt-3')

*TGF* (5'-tagcgctgggtatcctgtag-3', 5'-tggaagcagtactgagtgtg-3')

*HB-EGF* (5'-gatccacaaaccagctgctac-3', 5'-tcttctccctaaccctttc-3')

Target sequences were amplified using 95°C/30 sec, 59°C/60 sec, and 72°C/30 sec conditions.
